# Supplementary material
Source: Royal Society of Chemistry journal article supplement (doi:10.1039/d6cc01707j)
Supplement: d6cc01707j1.pdf [file d6cc01707j1.pdf]

## Electronic Supplementary Information

### **Flash-Joule Heating Enables Rapid Solid-State Synthesis of Multinary Chalcogenides: A Case Study on $\text{Cu}_2\text{Mo}_6\text{S}_8$**

Pranay Ninawe,<sup>a†</sup> Cocoro A. Nagasaka,<sup>a†</sup> and Jesús M. Velázquez<sup>\*a</sup>

<sup>a</sup> *Department of Chemistry, University of California, Davis, One Shields Avenue, Davis, California 95616, United States*

<sup>†</sup> *Contributed Equally*

<sup>\*</sup>*Corresponding author: email: [jvelazquez@ucdavis.edu](mailto:jvelazquez@ucdavis.edu)*

| <b>Table of Contents</b>                                                                                                                | <b>Page</b> |
|-----------------------------------------------------------------------------------------------------------------------------------------|-------------|
| <b>1. Experimental Methods</b>                                                                                                          | <b>S1</b>   |
| <b>2. Figures &amp; Tables</b>                                                                                                          | <b>S2</b>   |
| <b>3. Figure S1: PXRD – Step-heating mode</b>                                                                                           | <b>S2</b>   |
| <b>4. Figure S2: PXRD – Step-heating mode</b>                                                                                           | <b>S3</b>   |
| <b>5. Figure S3: PXRD – Flash-heating mode</b>                                                                                          | <b>S4</b>   |
| <b>6. Figure S4: Rietveld Refinement</b>                                                                                                | <b>S5</b>   |
| <b>7. Figure S5: SEM Images</b>                                                                                                         | <b>S6</b>   |
| <b>8. Figure S6: EDS – Step-heating mode</b>                                                                                            | <b>S7</b>   |
| <b>9. Figure S7: EDS – Flash-heating mode</b>                                                                                           | <b>S8</b>   |
| <b>10. Table S1: Flash and Step heating comparison for <math>\text{Cu}_2\text{Mo}_6\text{S}_8</math></b>                                | <b>S9</b>   |
| <b>11. Figure S8: PXRD - <math>\text{Fe}_{1.32}\text{Mo}_6\text{S}_8</math> and <math>\text{Fe}_2\text{Mo}_6\text{S}_8</math></b>       | <b>S10</b>  |
| <b>12. Figure S9: SEM Images - <math>\text{Fe}_{1.32}\text{Mo}_6\text{S}_8</math> and <math>\text{Fe}_2\text{Mo}_6\text{S}_8</math></b> | <b>S11</b>  |
| <b>13. Figure S10: EDS - <math>\text{Fe}_{1.32}\text{Mo}_6\text{S}_8</math> (Step-heating mode)</b>                                     | <b>S12</b>  |
| <b>14. Figure S11: EDS - <math>\text{Fe}_2\text{Mo}_6\text{S}_8</math> (Flash-heating mode)</b>                                         | <b>S13</b>  |
| <b>15. Figure S12: XPS – <math>\text{Fe}_{1.32}\text{Mo}_6\text{S}_8</math> (Step-heating mode)</b>                                     | <b>S14</b>  |
| <b>16. Figure S13: XPS - <math>\text{Fe}_2\text{Mo}_6\text{S}_8</math> (Flash-heating mode)</b>                                         | <b>S15</b>  |
| <b>17. Figure S14: PXRD - <math>\text{Ni}_2\text{Mo}_6\text{S}_8</math></b>                                                             | <b>S16</b>  |
| <b>18. Figure S15: SEM Images - <math>\text{Ni}_2\text{Mo}_6\text{S}_8</math></b>                                                       | <b>S17</b>  |
| <b>19. Figure S16: EDS - <math>\text{Ni}_2\text{Mo}_6\text{S}_8</math> (Step-heating mode)</b>                                          | <b>S18</b>  |
| <b>20. Figure S17: EDS - <math>\text{Ni}_2\text{Mo}_6\text{S}_8</math> (Flash-heating mode)</b>                                         | <b>S19</b>  |
| <b>21. Figure S18: XPS – <math>\text{Ni}_2\text{Mo}_6\text{S}_8</math> (Step-heating mode)</b>                                          | <b>S20</b>  |
| <b>22. Figure S19: XPS - <math>\text{Ni}_2\text{Mo}_6\text{S}_8</math> (Flash-heating mode)</b>                                         | <b>S21</b>  |
| <b>23. Table S2: Estimation of Energy Consumption</b>                                                                                   | <b>S22</b>  |

## Experimental Methods

### Materials:

MoS<sub>2</sub> powder (>98%, ~325 mesh) and Graphite (20+100 mesh, 99% C) was purchased from Thermo Scientific, Mo powder (99.99%, ~250 mesh), FeS powder and Cu<sub>2</sub>S powder (99.5%, ~200 mesh) were used as purchased from Sigma-Aldrich. S powder (99.5%) was purchased from Alfa Aesar. Fused silica tubes and Graphite plugs were purchased from ACS materials. Carbon Black (Vulcans XC-72R) was purchased from FuelCellStore.

### Structural and spectroscopic characterization:

The reaction was carried out in an ACS Helio Volt Flash-Joule setup. Structural characterization and the phase purity of Cu<sub>2</sub>Mo<sub>6</sub>S<sub>8</sub> were carried out via PXRD measurements using a Bruker D8 Advance diffractometer with Cu K-alpha radiation (1.54 Å). The FEI Scios Dual Beam FIB/ scanning electron microscope (SEM) system was used to probe the morphology. An Oxford energy-dispersive X-ray (EDX) detector was used to confirm the stoichiometry and the uniform distribution of all the elements across the samples. Surface composition was probed *via* X-ray photoelectron spectroscopy (XPS) using a Kratos Supra Axis spectrometer with an Al anode (1486.6 eV).

X-ray absorption spectroscopy (XAS) measurements were performed at the Stanford Synchrotron Radiation Lightsource, located at the SLAC National Accelerator Laboratory. X-ray Absorption Near-Edge Structure (XANES) spectra at the S K-edge, Cu K-edge, and Mo L<sub>3</sub>-edge were collected at beamline 4-3. The incident beam energy was calibrated using sodium thiosulfate as a standard for the S K-edge, while a copper metal foil served as the reference for Cu calibration. Tender X-ray measurements were conducted under a He atmosphere to minimize fluorescence signal attenuation caused by air absorption at lower energies. For each material, three fluorescence scans were acquired using a Lytle detector to ensure reproducibility and signal quality.

## Figures & Tables

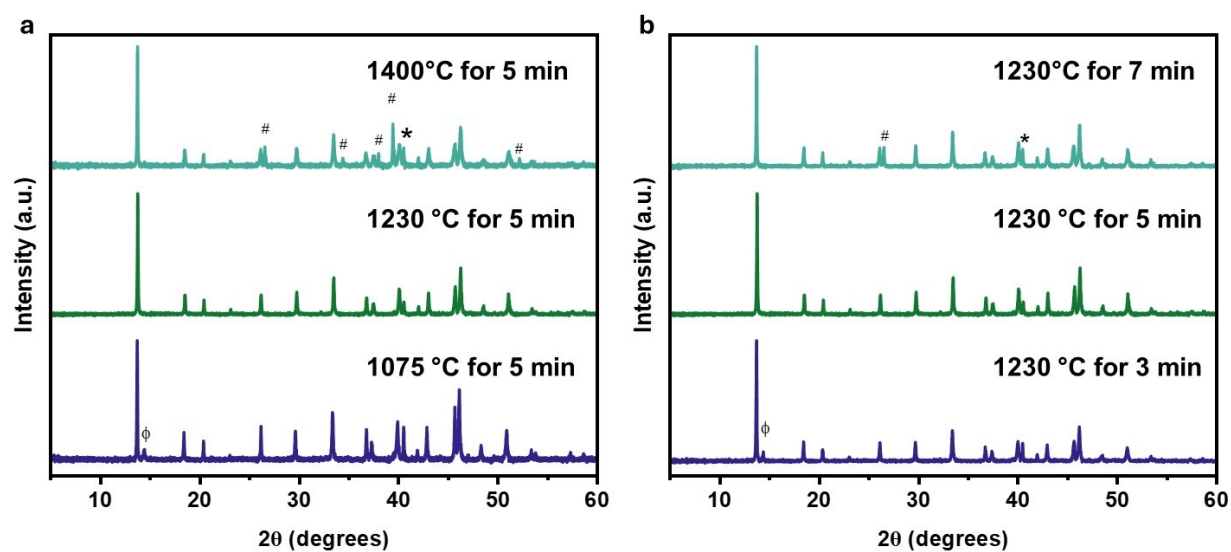

**Figure S1.** Powder X-ray Diffraction Pattern as a function of (a) Temperature and (b) Time in the step-heating mode. (the symbols represent the impurities,  $\phi$  - MoS<sub>2</sub>, \* - Mo, # - Mo oxides)

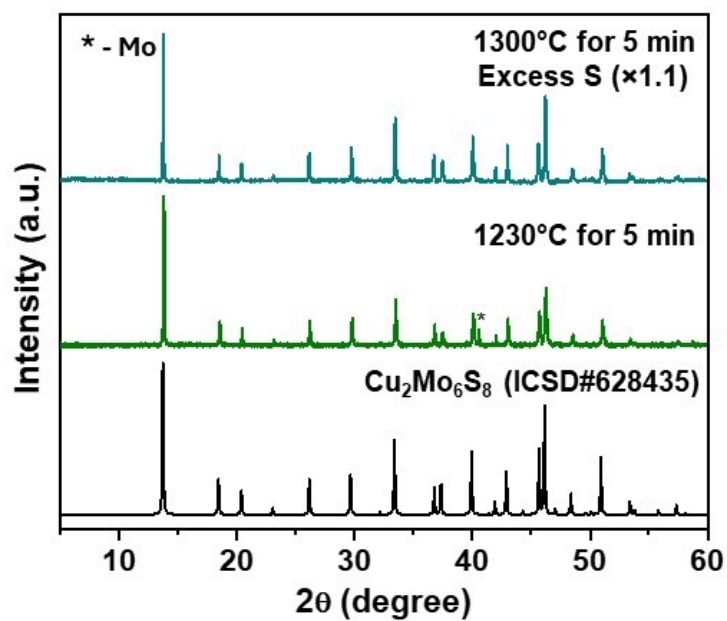

**Figure S2.** Powder X-ray Diffraction Pattern of  $\text{Cu}_2\text{Mo}_6\text{S}_8$  synthesized using the optimized reaction conditions for step-heating mode. (The symbol (\*) represent the Mo impurity)

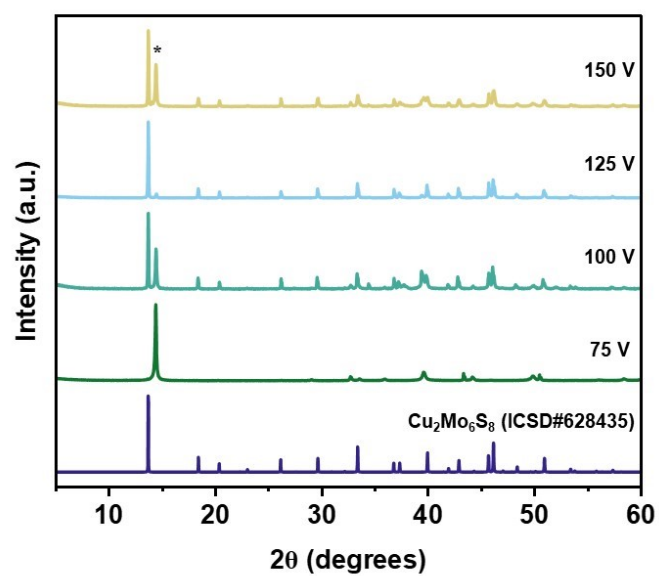

**Figure S3.** Powder X-ray Diffraction Pattern of  $\text{Cu}_2\text{Mo}_6\text{S}_8$  as a function of applied voltage in the flash-heating mode. (The symbol (\*) represent the  $\text{MoS}_2$  impurity)

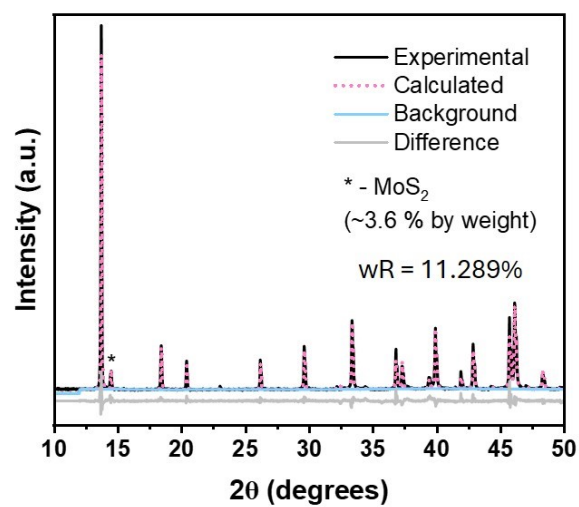

**Figure S4.** Rietveld refinement of powder X-ray diffraction pattern of  $\text{Cu}_2\text{Mo}_6\text{S}_8$  synthesized in the flash-heating mode at 125 V.

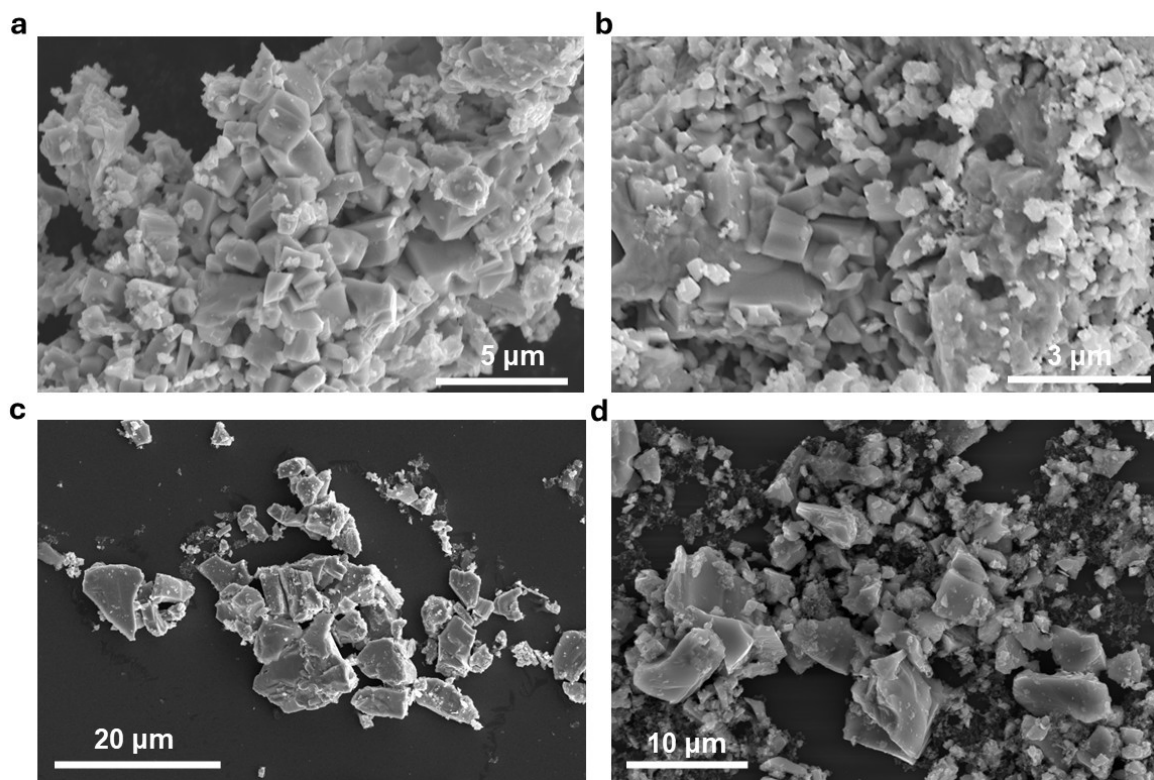

**Figure S5.** Scanning electron microscopy (SEM) images of  $\text{Cu}_2\text{Mo}_6\text{S}_8$  synthesized using (a-b) step -heating and (c-d) flash-heating.

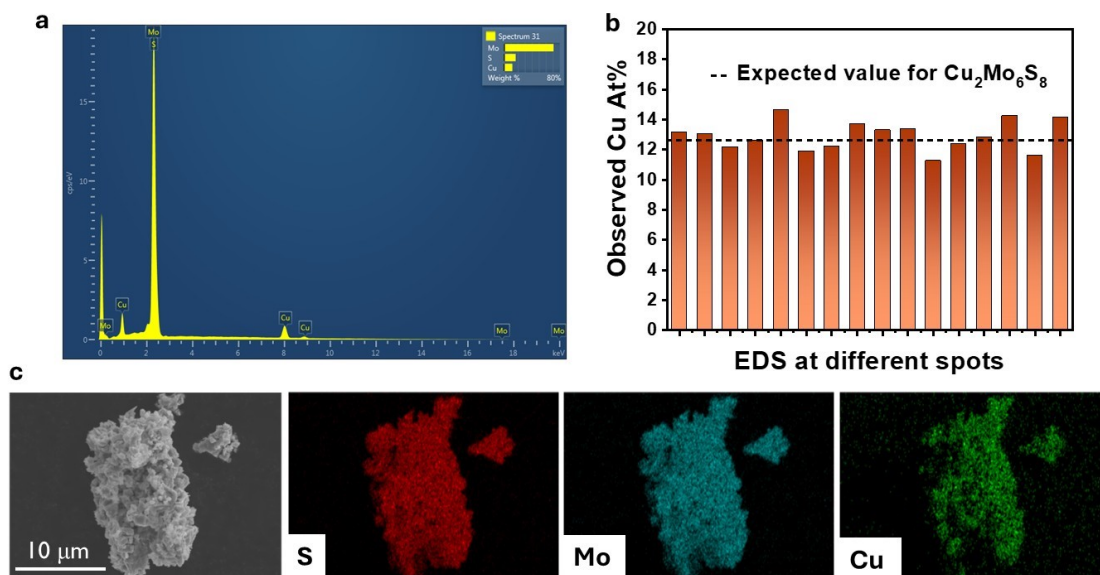

**Figure S6.** Energy dispersive X-ray spectroscopy (EDS): (a) spectra, (b) observed Cu At % at different spots, (c) mapping of  $\text{Cu}_2\text{Mo}_6\text{S}_8$  synthesized using step-heating mode.

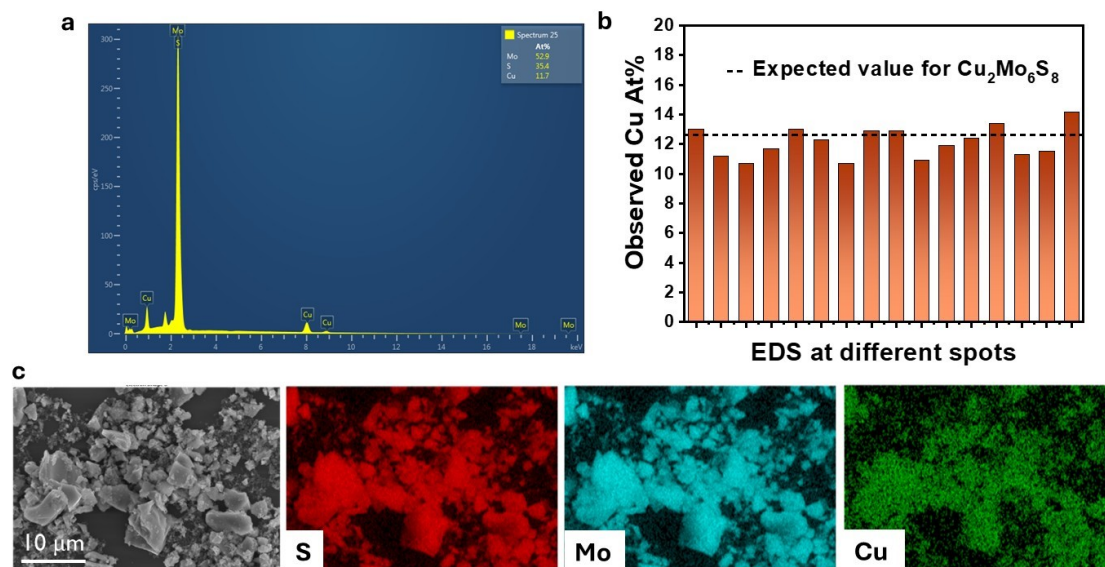

**Figure S7.** Energy dispersive X-ray spectroscopy (EDS): (a) spectra, (b) observed Cu At % at different spots, (c) mapping of  $\text{Cu}_2\text{Mo}_6\text{S}_8$  synthesized using flash-heating mode.

**Table S1:** Flash and Step heating comparison for  $\text{Cu}_2\text{Mo}_6\text{S}_8$ 

| <b>Heating Mode</b>         | <b>Step Heating</b>       | <b>Flash heating</b>        |
|-----------------------------|---------------------------|-----------------------------|
| <i>Heating mechanism</i>    | Resistive heating         | Capacitive discharge        |
| <i>Heating rate</i>         | Slow - Continuous heating | Fast - Pulse heating        |
| <i>Use case</i>             | Scalable bulk synthesis   | Accessing metastable phases |
| <i>Reaction Time</i>        | 5 minutes                 | 1-2 s                       |
| <i>Reaction Temperature</i> | ~1300 °C                  | ~2000 °C                    |
| <i>Impurities</i>           | None                      | $\text{MoS}_2$              |
| <i>Morphology</i>           | Cuboidal crystallites     | Irregular                   |

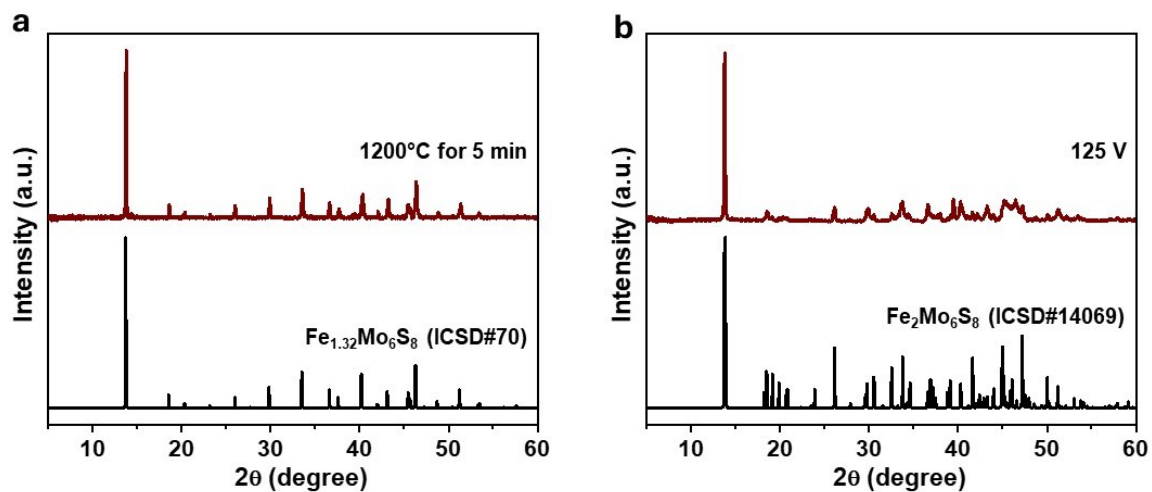

**Figure S8.** Powder X-ray Diffraction Pattern of (a)  $\text{Fe}_{1.32}\text{Mo}_6\text{S}_8$  synthesized using the step-heating mode and (b)  $\text{Fe}_2\text{Mo}_6\text{S}_8$  synthesized using the flash-heating mode.

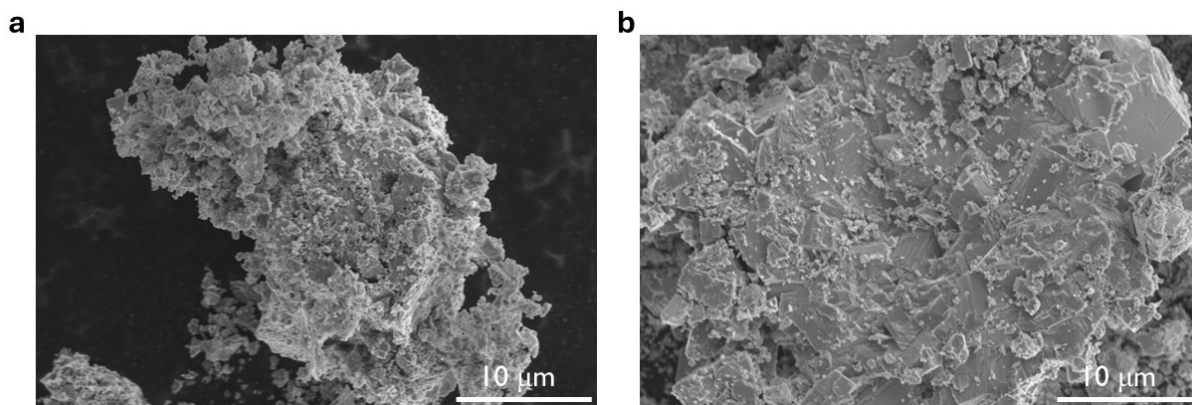

**Figure S9.** Scanning electron microscopy (SEM) images of (a)  $\text{Fe}_{1.32}\text{Mo}_6\text{S}_8$  synthesized using the step heating mode and (b)  $\text{Fe}_2\text{Mo}_6\text{S}_8$  synthesized using the flash heating mode.

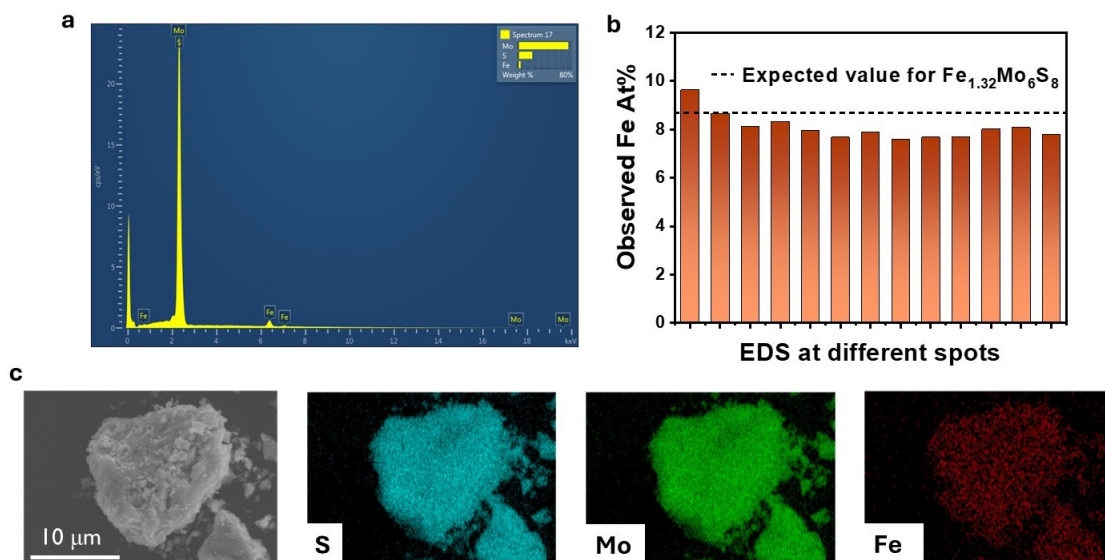

**Figure S10.** Energy dispersive x-ray spectroscopy (EDS): (a) spectra, (b) observed Fe At % at different spots, (c) mapping of  $\text{Fe}_{1.32}\text{Mo}_6\text{S}_8$  synthesized using step-heating mode.

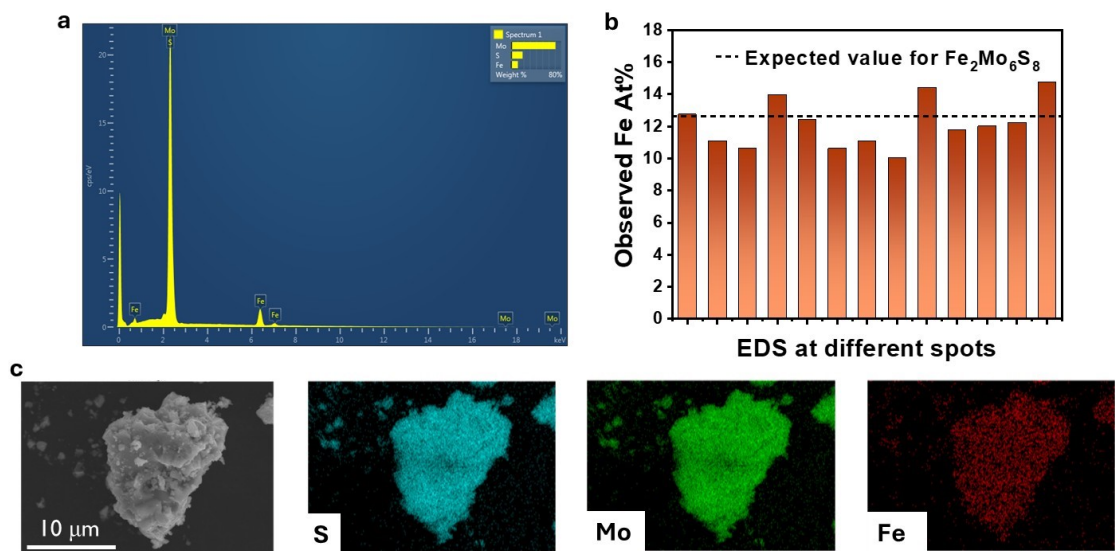

**Figure S11.** Energy dispersive x-ray spectroscopy (EDS): (a) spectra, (b) observed Fe At % at different spots, (c) mapping of  $\text{Fe}_2\text{Mo}_6\text{S}_8$  synthesized using flash-heating mode.

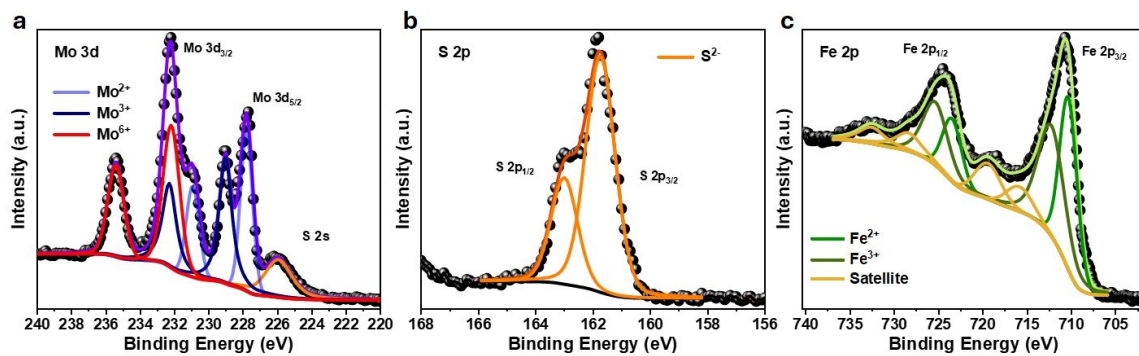

**Figure S12.** High-resolution X-ray photoelectron spectroscopy (XPS) spectra of (a) Mo 3d (b) S 2p and (c) Fe 2p for  $\text{Fe}_{1.32}\text{Mo}_6\text{S}_8$ .

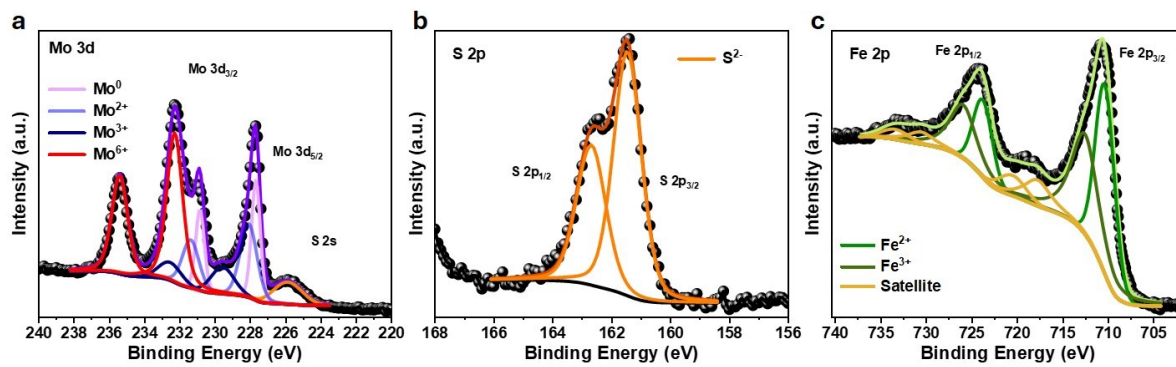

**Figure S13.** High-resolution X-ray photoelectron spectroscopy (XPS) spectra of (a) Mo 3d (b) S 2p and (c) Fe 2p for  $\text{Fe}_2\text{Mo}_6\text{S}_8$ .

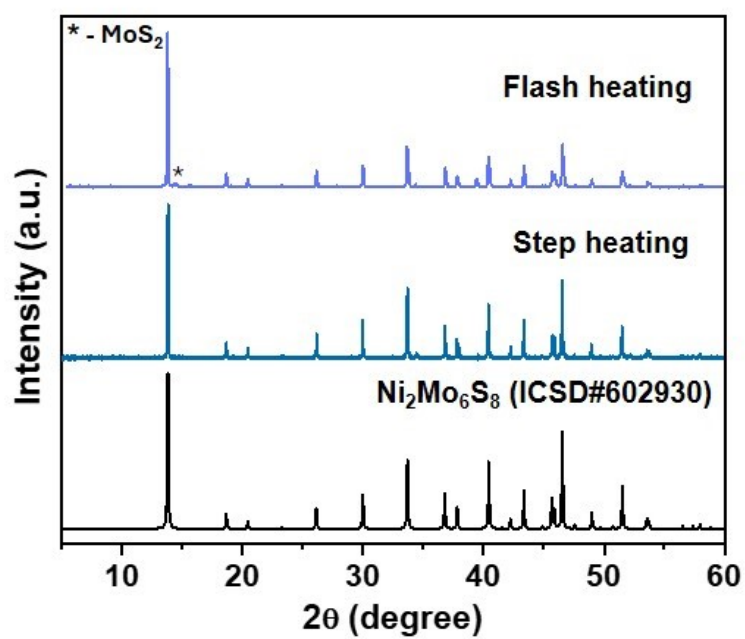

**Figure S14.** Powder X-ray Diffraction Pattern of Ni<sub>2</sub>Mo<sub>6</sub>S<sub>8</sub> synthesized using the step-heating mode and flash-heating mode.

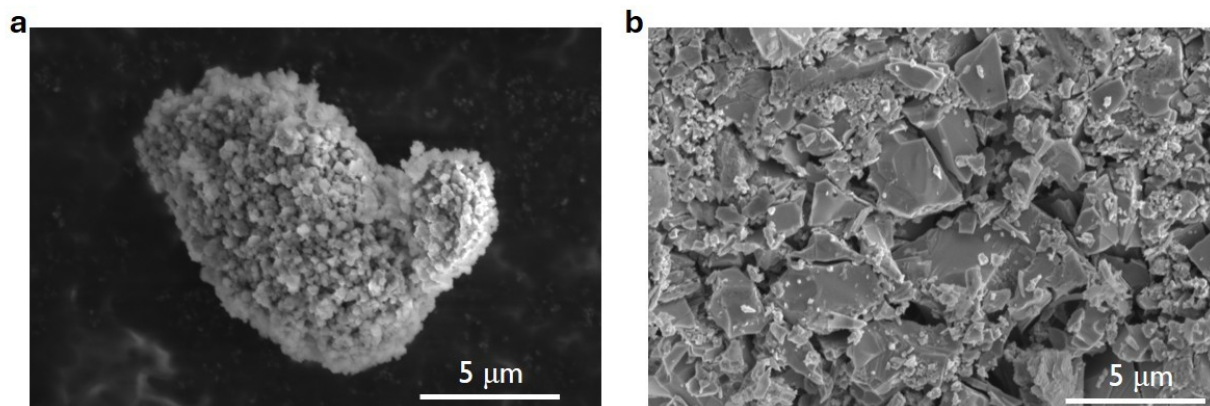

**Figure S15.** Scanning electron microscopy (SEM) images of Ni<sub>2</sub>Mo<sub>6</sub>S<sub>8</sub> synthesized using the (a) flash heating mode and (b) step heating mode.

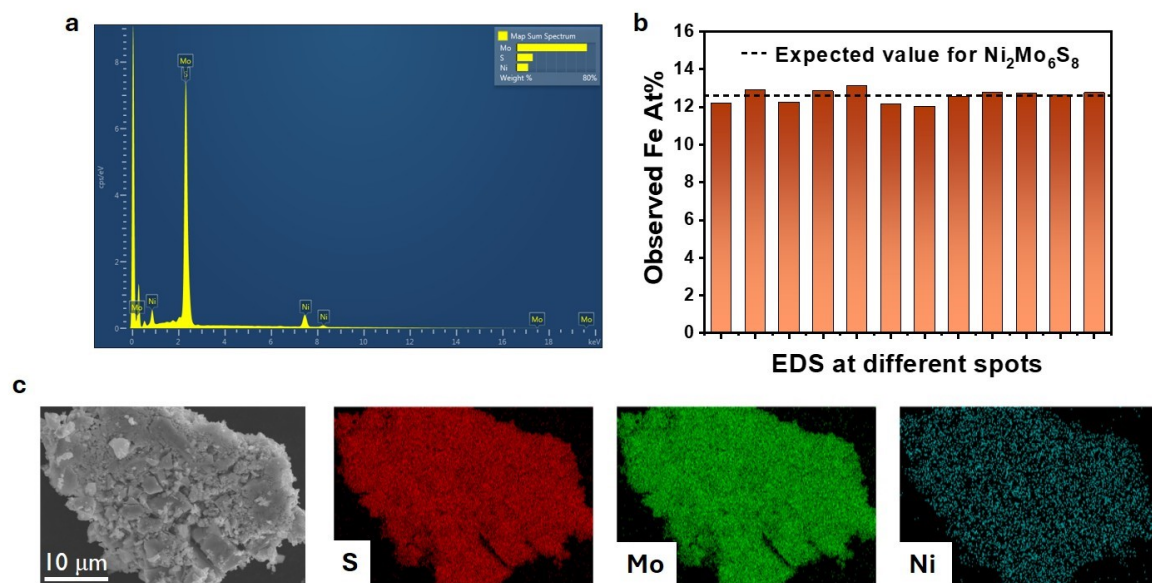

**Figure S16.** Energy dispersive x-ray spectroscopy (EDS): (a) spectra, (b) observed Ni At % at different spots, (c) mapping of  $\text{Ni}_2\text{Mo}_6\text{S}_8$  synthesized using step-heating mode.

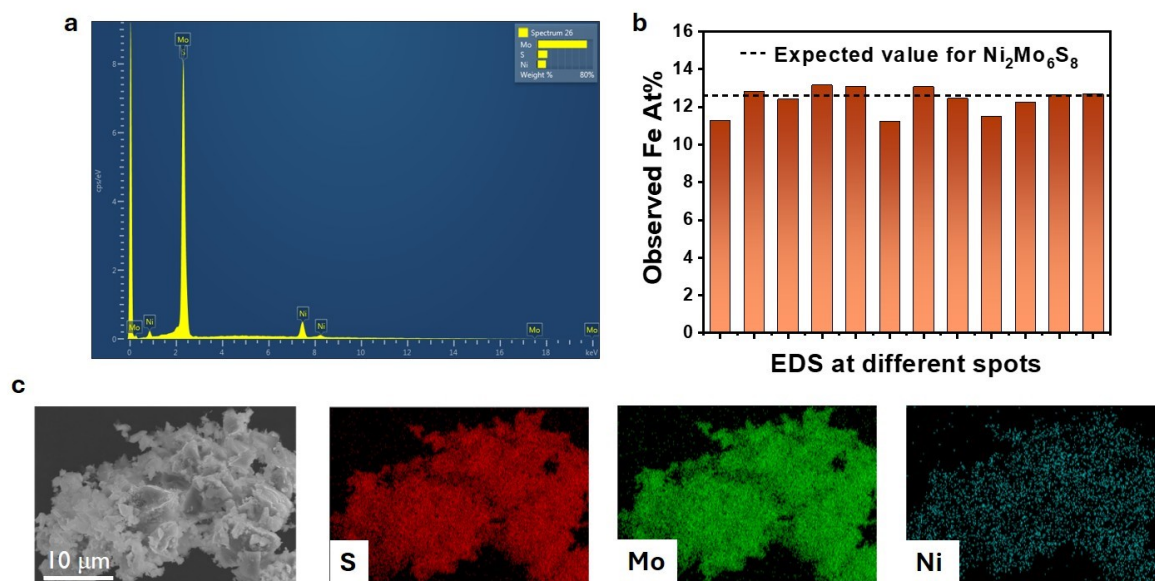

**Figure S17.** Energy dispersive x-ray spectroscopy (EDS): (a) spectra, (b) observed Ni At % at different spots, (c) mapping of  $\text{Ni}_2\text{Mo}_6\text{S}_8$  synthesized using flash-heating mode.

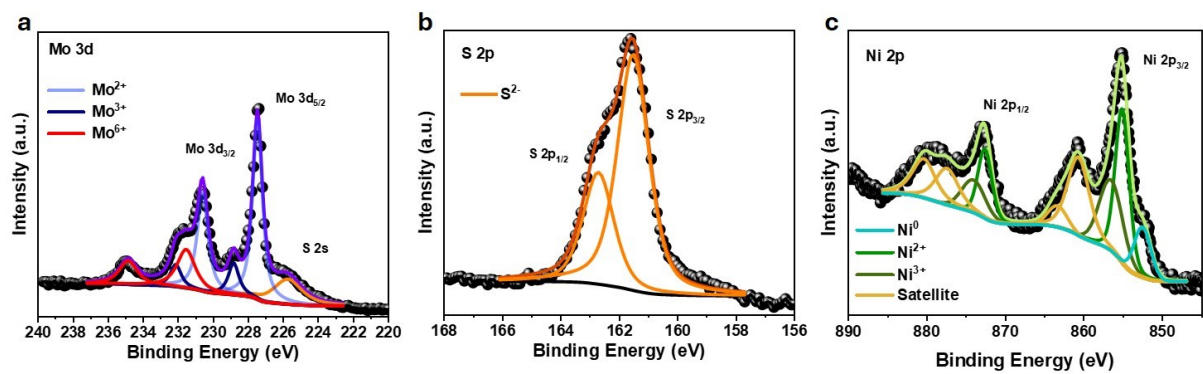

**Figure S18.** High-resolution X-ray photoelectron spectroscopy (XPS) spectra of (a) Mo 3d (b) S 2p and (c) Ni 2p for Fe<sub>2</sub>Mo<sub>6</sub>S<sub>8</sub> synthesized using Step mode.

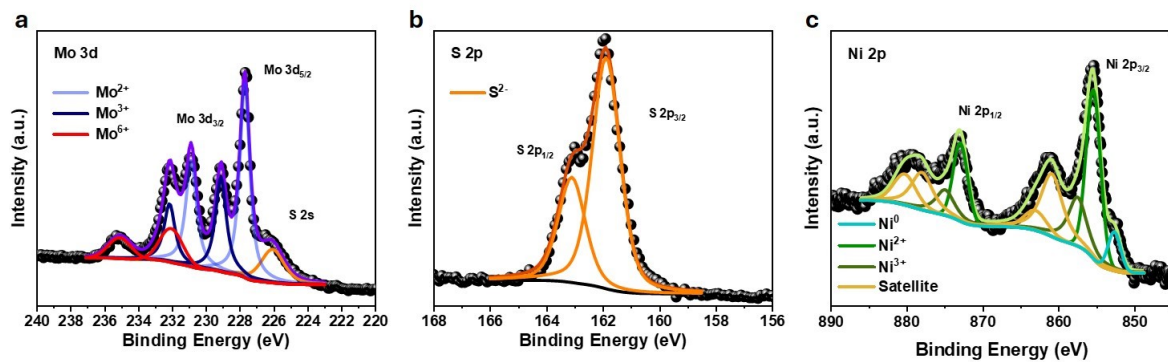

**Figure S19.** High-resolution X-ray photoelectron spectroscopy (XPS) spectra of (a) Mo 3d (b) S 2p and (c) Ni 2p for Fe<sub>2</sub>Mo<sub>6</sub>S<sub>8</sub> synthesized using Flash mode.

**Table S2:** Estimation of Energy Consumption for Cu<sub>2</sub>Mo<sub>6</sub>S<sub>8</sub> Synthesis Using Flash, Step, Microwave, and Conventional Furnace Heating Methods

| Heating Mode                             | Furnace                                                         | Microwave                                                             | Step Heating                                        | Flash heating                                                                          |
|------------------------------------------|-----------------------------------------------------------------|-----------------------------------------------------------------------|-----------------------------------------------------|----------------------------------------------------------------------------------------|
| <b>Heating mechanism</b>                 | External resistive heating                                      | Dielectric/Microwave absorption                                       | Joule heating                                       | Capacitive discharge                                                                   |
| <b>Heating rate</b>                      | Slow - Continuous heating (5-20 °C min <sup>-1</sup> )          | Fast - Continuous heating (~40 °C s <sup>-1</sup> )                   | Fast - Continuous heating (~50 °C s <sup>-1</sup> ) | Extremely rapid - Pulse heating (10 <sup>3</sup> -10 <sup>5</sup> °C s <sup>-1</sup> ) |
| <b>Reaction Time</b>                     | ~24 hours                                                       | ~10 minutes                                                           | ~5 minutes                                          | < 1 s                                                                                  |
| <b>Reaction Temperature</b>              | ~1100 °C                                                        | ~1100 - 1200 °C                                                       | ~1300 °C                                            | ~2000 °C                                                                               |
| <b>Power</b>                             | 1.5 kW                                                          | 1.2 kW                                                                | -                                                   | -                                                                                      |
| <b>Energy Equation (E)</b>               | Power rating × t (s)                                            | Power × t (s)                                                         | V × I × t                                           | ½ C × V <sup>2</sup>                                                                   |
| <b>Approximate Energy required (kWh)</b> | ~36                                                             | ~0.2                                                                  | ~0.01                                               | ~10 <sup>-4</sup>                                                                      |
| <b>Reference</b>                         | Y-J Kim., et.al. <i>RSC Adv.</i> , <b>2014</b> , 4, 59048-59055 | J. M. Velazquez., <i>J. Coord. Chem.</i> <b>2019</b> , 72, 1322-1335. | This work                                           | This work                                                                              |

t = time; R = Resistance (ohm); I = Current (A); V = Voltage (V); C = Capacitance (F)
